# Supplementary material for: Unraveling the interfacial homogeneity and bulk crystallization for efficient and stable perovskite solar cells via ionic liquids
Source: Royal Society of Chemistry journal article supplement (doi:10.1039/d4ee05135a), 2025-01-01
Supplement: d4ee05135a1.pdf [file d4ee05135a1.pdf]

**Supporting information**

**Unraveling the Interfacial Homogeneity and Bulk Crystallization for Efficient and  
Stable Perovskite Solar Cells via Ionic Liquids**

Xiaowei Xu<sup>a</sup>, Sibor Li<sup>#b</sup>, Chengwei Shan<sup>a</sup>, Xiaoyu Gu<sup>a</sup>, Jie Zeng<sup>c</sup>, Wenbo Peng<sup>c</sup>, Tingting Dai<sup>d</sup>, Xin Xu<sup>a</sup>,  
Xianghui Zeng<sup>e</sup>, Erjun Zhou<sup>d</sup>, Chen Xie<sup>e</sup>, Yong Zhang<sup>\*c,f</sup>, Longbin Qiu<sup>\*b</sup>, Baomin Xu<sup>\*c</sup>, Aung Ko Ko  
Kyaw<sup>\*a</sup>

<sup>a</sup>Guangdong University Key Laboratory for Advanced Quantum Dot Displays and Lighting, and  
Department of Electronic & Electrical Engineering, Southern University of Science and Technology,  
Shenzhen 518055, PR China

<sup>b</sup>Shenzhen Key Laboratory of Intelligent Robotics and Flexible Manufacturing Systems, Department  
of Mechanical and Energy Engineering, SUSTech Energy Institute for Carbon Neutrality, Southern  
University of Science and Technology, Shenzhen 518055, China

<sup>c</sup>Department of Materials Science and Engineering, Southern University of Science and Technology,  
Shenzhen, Guangdong 518055, China.

<sup>d</sup>College of Biological, Chemical Sciences and Engineering, Jiaying University, Jiaying, Zhejiang  
314001, China

<sup>e</sup>College of New Materials and New Energies, Shenzhen Technology University, Shenzhen 518118,  
China

<sup>f</sup>Sustainable Energy and Environment Thrust, Function Hub, The Hong Kong University of Science  
and Technology (Guangzhou), Nansha, Guangzhou, 511400 Guangdong, China

<sup>#</sup>These authors contributed equally

1 \*Corresponding authors: Corresponding authors: Aung Ko Ko Kyaw, E-mail: aung@sustech.edu.cn;  
2 Longbin Qiu, E-mail: qiulb@sustech.edu.cn ; Yong Zhang, E-mail: yongzhang@hkust-gz.edu.cn;  
3 Baomin Xu, E-mail: xubm@sustech.edu.cn

4

## 5 **Table of contents**

6 Experimental Section

7 Figure S1-S32

8 Table S1-S8

9

## 10 **Experimental Section**

### 11 **Materials**

12 All materials are commercially without purification unless specified. Formamidinium iodide (FAI)  
13 and nickel oxide ( $\text{NiO}_x$ ) were purchased from Advanced Electron Technology CO., Ltd..  
14 Methylammonium bromine (MABr) was purchased from Greatcell Solar Materials.  
15 Methylammonium chloride (MACl), cesium iodide (CsI) and 2-Thiopheneethylammonium chloride  
16 (TEACl) were bought from Xi'an e-Light New Material Co., Ltd. 1,4-di(methylimidazolium)-butane  
17 dibromide and tetramethylguanidine tetrafluoroborate were purchased from Lanzhou Greenchem  
18 ILs. Co., Ltd. N, N-dimethylformamide (DMF), dimethylsulfoxide (DMSO) were bought from Alfa  
19 Aesar. Isopropanol (Ultradry 99.5%), methanol and ultradry ethanol were purchased from Sigma-  
20 Aldrich. Lead iodide ( $\text{PbI}_2$ ) was purchased from Tokyo Chemical Industry (TCI). (4-(7H-  
21 dibenzo[c,g]carbazol-7-yl)butyl)phosphonic (4PADCB) were bought from Borun New Material. Lead  
22 bromide ( $\text{PbBr}_2$ ), C60, and 2,9-dimethyl-4,7-diphenyl-1,10-phenanthroline (BCP) were purchased  
23 from Xi'an Polymer Light Technology Corp. Chlorobenzene (CB) and anhydrous ethanol were  
24 purchased from Aladdin. Silver grain was purchased from ZhongNuo Advanced Material (Beijing)  
25 Technology Co., Ltd. Poly(methyl methacrylate) (PMMA,  $M_w=150000$ ) was purchased from Energy  
26 Chemistry.

27

### 28 **Preparation of the perovskite precursor**

1 226.7 mg FAI, 21.0 mg CsI, 7.8 mg MABr, 2.54 mg PbBr<sub>2</sub> and 661.3 mg PbI<sub>2</sub> and 12.0 mg MAI were  
2 dissolved in 1.0 mL mixed solvents (DMF: DMSO = 4:1, volume: volume). The perovskite precursor  
3 was stirred overnight at room temperature. To prepare the precursor solutions with TMGBF<sub>4</sub> (1,3,  
4 5 mol% with respect to PbI<sub>2</sub>), the additive was added to the DMF precursor solution.

## 6 **Device fabrication**

7 ITO/glass substrates (15 Ω sq<sup>-1</sup> purchased from Advanced Electron Technology. CO., Ltd.) were  
8 sequentially ultrasonic cleaned in diluted detergent, deionized water (DI) water, isopropanol (IPA)  
9 and ethyl alcohol for 10 min sequentially and then dried in an oven. The pre-clean ITO glasses were  
10 treated with UV-Ozone for 25 min before depositing the hole transport layer. NiO<sub>x</sub> dispersion (15  
11 mg/mL in DI water) was sonicated for 6 min and then filtered with 0.22 μm polyether sulfone (PES)  
12 filter before usage. Afterwards, 40 μL of the dispersion was spin-coated on the ITO/glass substrate  
13 at a speed of 2000 rpm for 30 s, followed by an annealing at 200 °C for 25 min in air. After cooling,  
14 the substrates were transferred to a nitrogen-filled glove box. Then 4PADCB dissolved in anhydrous  
15 ethanol with a concentration of 0.5 mg/mL was spin-coated on NiO<sub>x</sub>/ITO/glass at a speed of 3000  
16 rpm for 30 s, followed by annealing at 120 °C for 12 min. After that, Bu(MIm)<sub>2</sub>Br<sub>2</sub> (0.5 mg/mL  
17 dissolved in methanol) was dynamically spin-coated at a speed of 4000 rpm for 20 s, followed by  
18 annealing at 120 °C for 5 min. The perovskite precursor solution was filter by 0.22 μm PTFE filter  
19 and then spin-coated at a consecutive two-step process with 1000 rpm for 5 s followed by 4000 rpm  
20 for 25 s. During the second step, 200 μL of chlorobenzene was dropped on the substrate during the  
21 last 11 s of spin coating, and then annealed at 120 °C for 30 min. After cooling down, the substrate  
22 was treated with TEACl dissolved in a mixed solution (IPA: DMSO = 1000: 5. volume: volume, 0.8  
23 mg/mL) at 4000 rpm for 30 s dynamically, followed by heat treatment at 120 °C for 5 min. Then the  
24 PMMA solution (0.5 mg/mL) was dynamically spin-coated on the films at 5000 rpm for 30 s. Finally,  
25 C60 (17 nm), BCP (7 nm) and Ag (80 nm) electrode was deposited by thermal evaporation with a  
26 mask area of 0.04 cm<sup>2</sup>.

## 28 **Device characterization**

29 The *J-V* curves of the perovskite solar cells were measured with Keithley 2400 source meter under

1 1 sun (AM 1.5G spectrum) generated from a class solar simulator (Japan, SAN-EI, XES-40S1). The  
2 EQE spectrum was measured using a Solar Cell Spectral Response Measurement System QE-R3011  
3 (Enlitech Co., Ltd.). The light intensity at each wavelength was calibrated using a standard single  
4 crystal Si photovoltaic cell. The stability of the unencapsulation device was tested under AM 1.5G  
5 illumination with light intensity of 100 mW/cm<sup>2</sup> in different condition. The dark current density was  
6 measured by the semiconductor parameter analyzer (Keithley 2400). The dynamic range  
7 measurements were performed under different intensities of monochromatic light using ThorLabs  
8 metallic coated neutral density filters. Capacitance-Voltage (CV) and Capacitance-frequency (C-f)  
9 measurements were performed with a frequency analyzer module-equipped potentiostat  
10 (PGSTAT302N, Autolab) in dark condition.

11

## 12 **Sample characterization**

13 The photoluminescence (PL) spectra and time-resolved (TRPL) were performed with a 532 nm laser  
14 driven by TektronixAGF1062A function generator integrated and a 350 MHz Tektronix MDO3034  
15 oscilloscope. PL mapping was used in the Laser micro-confocal Raman spectrometer (LabRAM HR  
16 Evolution) with a 325 nm laser. The scanning electronic microscope (SEM) images were obtained  
17 from Apreo2 S Lovac field emission. The XPS and UPS spectra were recorded on ESCALab250Xi  
18 multifunction X-ray photoelectron spectrometer. The UV-vis absorption spectra were measured by  
19 Hitachi U-3010 spectrophotometer. Grazing incidence wide-angle X-ray scattering (GIWAXS)  
20 measurements were carried out with a Xenocs Xeuss 2.0 system with an Excillum etalJet-D2 X-ray  
21 source (70 kV, 2.857 mA, 1.341 Å) and a DECTRIS PILATUS3 R 1M area detector. The incidence angle  
22 is 0.2°. The <sup>19</sup>F and <sup>1</sup>H NMR measurements were performed on an AVANCE III 400M (Bruker). The  
23 surface and bottom roughness and potential were tested using a MultiMode 8-HR Atomic Force  
24 Microscope (AFM, Bruker) with a tapping amplitude modulation mode. Grazing incidence X-ray  
25 diffraction (GIXRD) patterns were acquired in air by using a Rigaku Smartlab with Cu K $\alpha$  radiation  
26 ( $\lambda$ = 1.5405 Å). The femtosecond transient absorption measurements were performed on a Helios  
27 spectrometer (Ultrafast Systems) pumped by a Ti:sapphire regenerative amplifier (Legend Elite,  
28 Coherent) operating at 5 kHz with fundamental wavelength of 800 nm and pulse width of ~40 fs.  
29 The film samples were prepared on quartz and were selectively excited using 750 nm excitation at  
30 a fluence of 0.5  $\mu$ J cm<sup>-2</sup> pulse, which corresponds to excitation densities on the order of  $\sim 10^{17}$  cm<sup>-3</sup>.

1 The sample for the XPS tests were thinned down by GmbH, which was performed on ION TOF SIMS  
2 5. Ar clusters (10 keV) were used in the sputtering. Bi<sup>3+</sup> (30 keV) was used to probe the sample  
3 surface in the analysis phase.

4

## 5 **Supplementary Note**

### 6 **1. Residual Stress Analysis**

7 The film stress can be calculated according to the Bragg's Law and generalized Hooke's Law, the  $2\theta$ -  
8  $\sin^2\Psi$  can be given by:<sup>1</sup>

$$\sigma = -\frac{E}{2(1+\nu)} \frac{\pi}{180} \cot\theta_0 \frac{\partial(2\theta)}{\partial \sin^2\Psi} \quad (1)$$

10 where E and  $\nu$  are Young's modulus (10 GPa) and Poisson's ratio of the perovskite film (0.3),  
11 respectively.  $\theta_0$  is the diffraction peak for strain-free perovskite crystal plane and  $\theta$  is the diffraction  
12 peak for the measured perovskite films.  $\phi$  is the angle of diffraction vector with respect to the  
13 sample normal direction.

14

### 15 **2. Williamson-Hall Analysis**

16 We calculated the variation of micro-strains according to the Williamson-Hall equation:<sup>2</sup>

$$\beta \times \cos\theta = \frac{K\lambda}{D} + 4\varepsilon \times \sin\theta \quad (2)$$

18 where D and  $\varepsilon$  represent the crystallite size and lattice distortion of perovskite films, respectively,  $\beta$   
19 is the FWHM of diffraction peaks,  $\theta$  is half of the scattering angle, K is the shape factor (0.9 for a  
20 cubic structure),  $\lambda$  is the wavelength of the incident X-rays (1.5406 Å)

21

### 22 **3. Doping density ( $N_A$ ) and space charge width (W)**

23 The slopes of the C-V plots reflect the carrier concentration and the extrapolated intersection with  
24 the voltage axis yield the built-in voltage. The carrier concentration was calculated from the Mott-  
25 Schottky relation:<sup>3</sup>

$$N_A = \frac{-2}{q\epsilon_r\epsilon_0 A^2} \left( \frac{dV}{dC^{-2}} \right)^{-1} \quad (3)$$

where  $\epsilon_r$  is the relative dielectric constant of perovskite ( $\epsilon_r = 4/7$ ), and the  $\epsilon_0$  is the dielectric constant of the vacuum, A is the device area. The space charge width (W) depends on the doping density and the built-in-voltage  $V_{bi}$  can be calculated by

$$W = \sqrt{\frac{2\epsilon_r\epsilon_0(V_{bi} - V)}{qN_A}} \quad (4)$$

where A is the active area, and V is the applied bias.

#### 4. Light intensity-dependent $V_{OC}$ analysis

$$V_{OC} = \frac{nk_B T}{q} \ln(I) + B \quad (5)$$

where  $k_B$ ,  $T$ ,  $q$ ,  $I$ ,  $B$  represent Boltzmann constant, thermodynamic temperature, the electron charge, light intensity and constant, respectively. The smaller n is theoretically, the indirect defect recombination at the interface (SRH recombination, Shockley-Read-Hall recombination) is smaller.

#### 5. Admittance Spectroscopy analysis

The standard C-V and TAS measurements were performed by using was performed with a frequency analyser module-equipped potentiostat (PGSTAT302N, Autolab) in dark condition. For the standard C-V measurement, the DC bias was scanning from 0 V to 1.3 V for the perovskite solar cells. The Mott-Schottky curves were obtained by analysing the data in PIAOS software. For the TAS measurement, the DC bias was fixed at 0 V and the amplitude of the AC bias was 1.0 V. The scanning range of the AC frequency was 10 to  $10^6$  Hz.

The total trap density of states (tDOS) spectrum was calculated through the equation:<sup>5, 6</sup>

$$N_T(E_\omega) = -\frac{V_{bi}\omega dC}{W d\omega qk_B T} \quad (6)$$

$$E_\omega = k_B T \ln\left(\frac{\beta T^2}{\omega}\right) \quad (7)$$

1 where  $q$  is the elementary charge,  $C$  is the capacitance, and  $\omega$  is the applied angular frequency.  $V_{bi}$   
 2 and  $W$  are the built-in potential and the depletion width, respectively, which can be extracted from  
 3 the Mott-Schottky analysis through the capacitance-voltage ( $C$ - $V$ ) measurement.

4

## 5 **6. Activation energy ( $E_a$ ) analysis**

6  $E_a$  values calculated by fitting the corresponding Arrhenius plots using the relation:

$$7 \quad \omega_{peak} = \beta T^2 \exp\left(-\frac{E_a}{k_B T}\right) \quad (8)$$

8 where  $\beta$  is a temperature-related parameter,  $T$  and  $k_B$  are the temperature and Boltzmann's  
 9 constant, respectively. The characteristic transition frequency values ( $\omega_{peak}$ ) were obtained from the  
 10 derivative of the capacitance-frequency spectra.

11

## 12 **7. FF losses analysis**

$$13 \quad FF_{max} = \frac{v_{oc} - \ln(v_{oc} + 0.72)}{v_{oc} + 1} \quad (9)$$

$$14 \quad \text{with } v_{oc} = \frac{qV_{oc}}{nK_B T} \quad (10)$$

15 where  $K_B$  is Boltzmann's constant,  $T$  is Kelvin temperature and  $q$  is electron charge,  $n$  is ideality  
 16 factor. The maximum FF is estimated without considering charge transport losses.

17

## 18 **8. Calculation of quasi-Fermi level splitting (QFLS) based on the PL quantum yield (PLQY)**

19 To investigate the non-radiative recombination perovskite film with and without TMGBF<sub>4</sub>  
 20 treatment, we calculated the Quasi-Fermi level splitting (QFLS) values by using photoluminescence  
 21 quantum yield (PLQY) measurements, which was conducted an FLS980 (Edinburgh Instruments Ltd.)  
 22 by a 450.5 nm laser taken from the bottom ITO side inside an integrated sphere. According to the  
 23 relation between QFLS and PLQY as the following equation:<sup>7</sup>

$$24 \quad QFLS = QFLS_{rad} + k_B T \cdot \ln(PLQY) = k_B T \cdot \ln\left(PLQY \frac{J_G}{J_{0,rad}}\right) \quad (11)$$

1 where  $QFLS_{rad}$  is the QFLS for the perovskite layer when only radiative recombination is present,  
 2  $k_B$  is the Boltzmann constant ( $1.38 \times 10^{-23}$  J/K), and T is the temperature (300 K).  $J_G$  is the generation  
 3 current density under illumination, in this case, approximated to the short-circuit current density  $J_{sc}$   
 4 of devices and  $J_{0,rad}$  is the dark radiative recombination saturation current density.

5 According to the detailed balance theory, the  $J_{0,rad}$  can be calculated by the following equations:

$$J_{0,rad} = q \int_0^{\infty} EQE_{PV}(E) \phi_{BB}(E) dE \quad (12)$$

$$\phi_{BB}(E) = \frac{2\pi E^2}{h^3 c^2} \cdot \frac{1}{\exp\left(\frac{E}{k_B T}\right) - 1} \quad (13)$$

8 Where q is the elementary charge,  $EQE_{PV}$  is the photovoltaic external quantum efficiency,  $E$  is the  
 9 photon energy,  $\phi_{BB}$  is the black-body radiative spectrum,  $h$  is the Planck constant, and  $c$  is the light  
 10 speed in a vacuum.  $J_{0,rad}$  of perovskite films without (Ref) and with (Target) is evaluated by EQE  
 11 curves measured in **Figure S26**, which was calculated as  $1.92 \times 10^{-20}$  mA cm<sup>-2</sup> for reference device  
 12 and  $1.63 \times 10^{-20}$  mA cm<sup>-2</sup> for target device, respectively. Subsequently, combined with the PLQY  
 13 value, the corresponding QFLS of the samples with and without TMGBF<sub>4</sub> treatment are 1.209 and  
 14 1.204, respectively. Besides, the  $V_{OC}$  non-radiation recombination loss can be obtained by the  
 15 following equation:

$$\Delta V_{OC}^{non-rad} = \frac{QFLS_{rad} - QFLS}{q} = - \frac{k_B T \ln(PLQY)}{q} \quad (14)$$



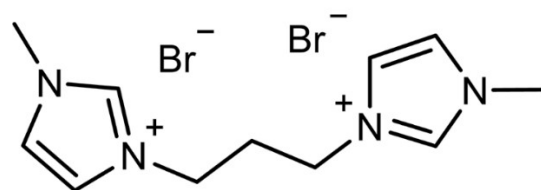

**Figure S1.** Chemical structure of 1,4-di(methylimidazolium)-butane dibromide (Bu(MIm)<sub>2</sub>Br<sub>2</sub>).

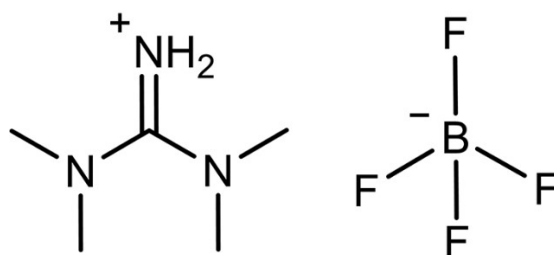

**Figure S2.** Chemical structure of tetramethylguanidine tetrafluoroborate (TMGBF<sub>4</sub>).

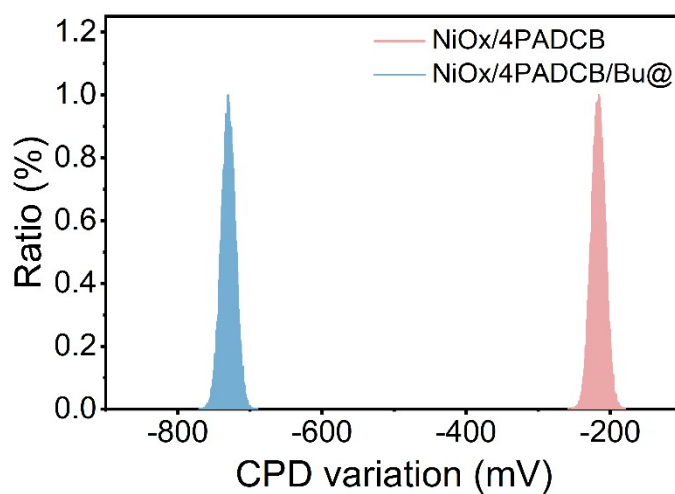

**Figure S3.** The statistical potential distributions of film surfaces.

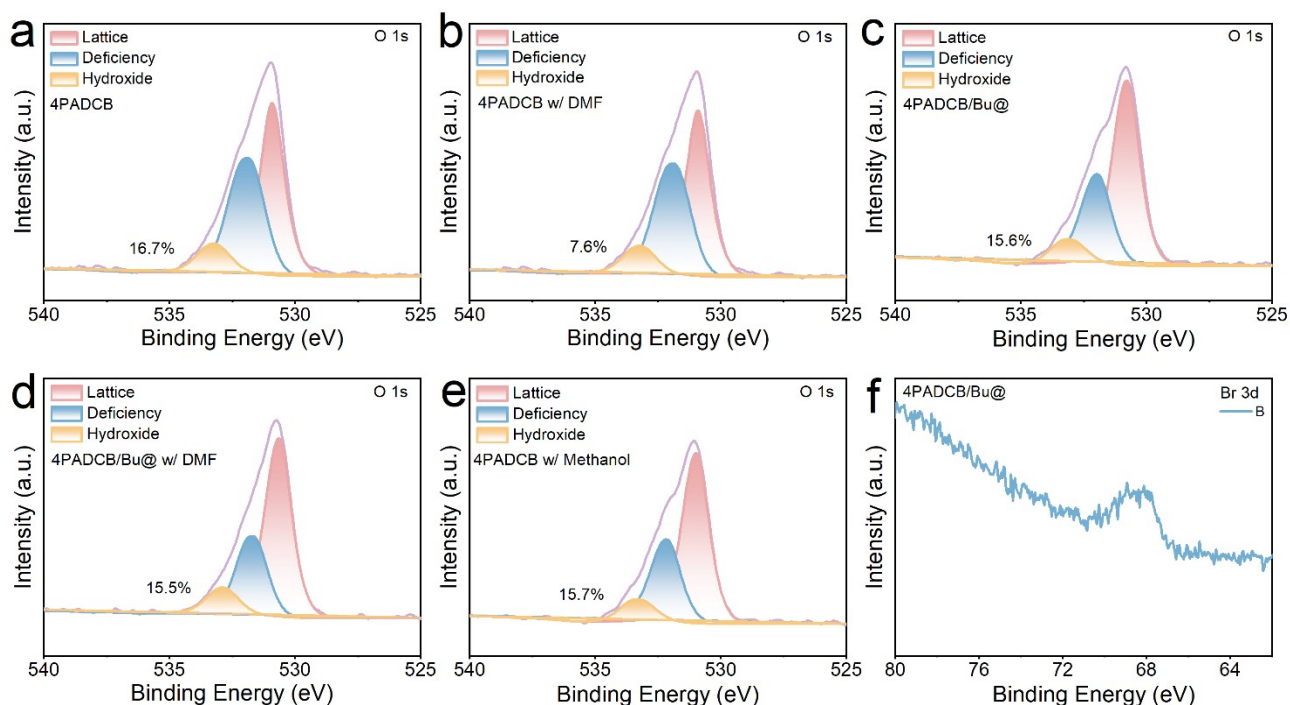

1  
2 **Figure S4.** High-resolution XPS spectra of O 1s core levels of (a-d) ITO/4PADCB and ITO/4PADCB/Bu  
3 without and with DMF rise, respectively. (e) ITO/4PADCB with methanol rinse. (f) High-resolution  
4 XPS spectra of Br 3d.

5

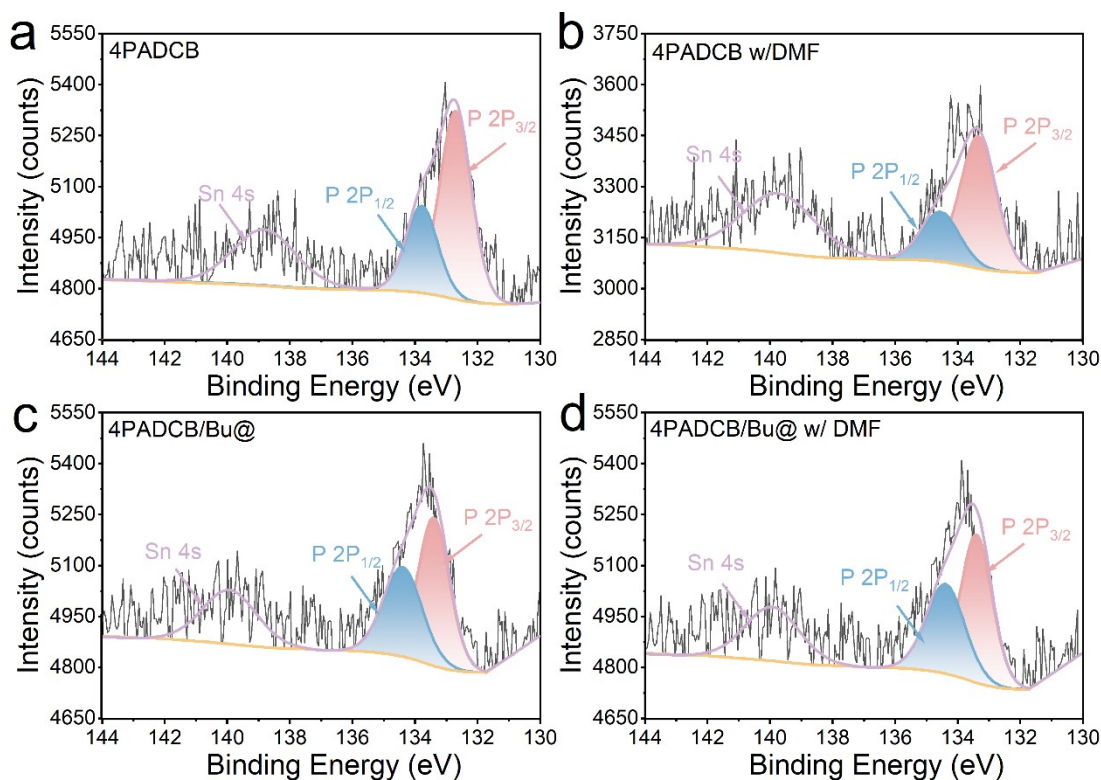

6  
7 **Figure S5.** High-resolution XPS spectra of P 2p core levels of (a-b) ITO/4PADCB without and with

1 DMF rinse, respectively. (c-d) ITO/4PADCB/Bu without and with DMF rinse, respectively.

2

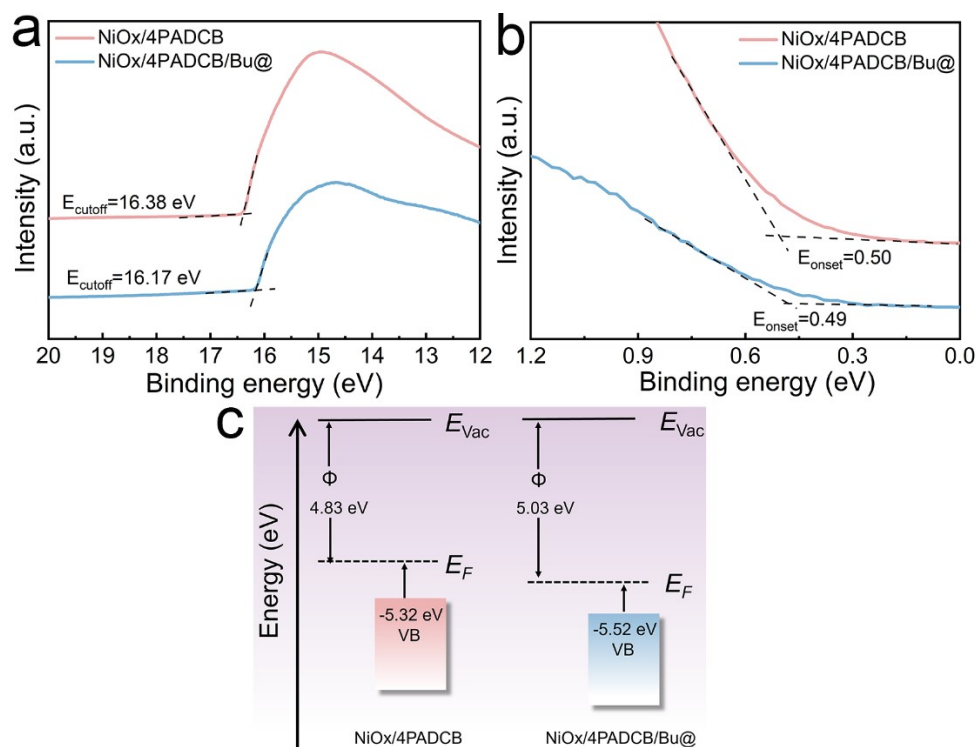

3

4 **Figure S6.** UPS spectra of (a) secondary electron cut-off and (b) valence bands for NiO<sub>x</sub>/4PADCB and  
5 NiO<sub>x</sub>/4PADCB/Bu@. (c) Schematic of adjustment of energy level alignment for for NiO<sub>x</sub>/4PADCB and  
6 NiO<sub>x</sub>/4PADCB/Bu@, respectively.

7

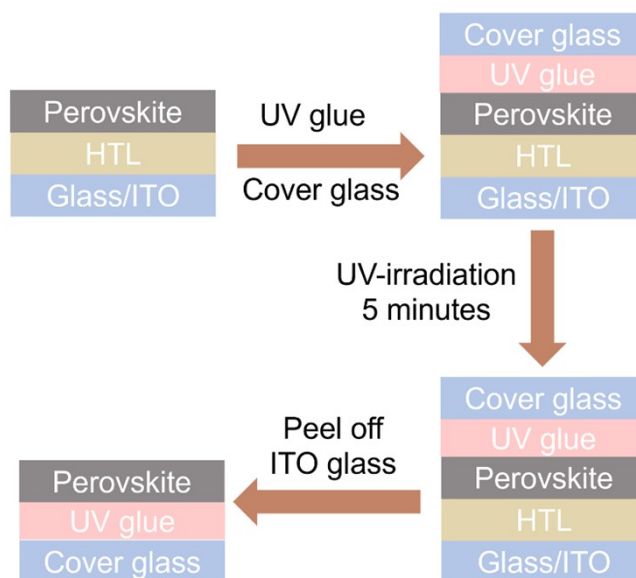

8

9 **Figure S7.** Schematic diagram of the bottom view for perovskite.

1

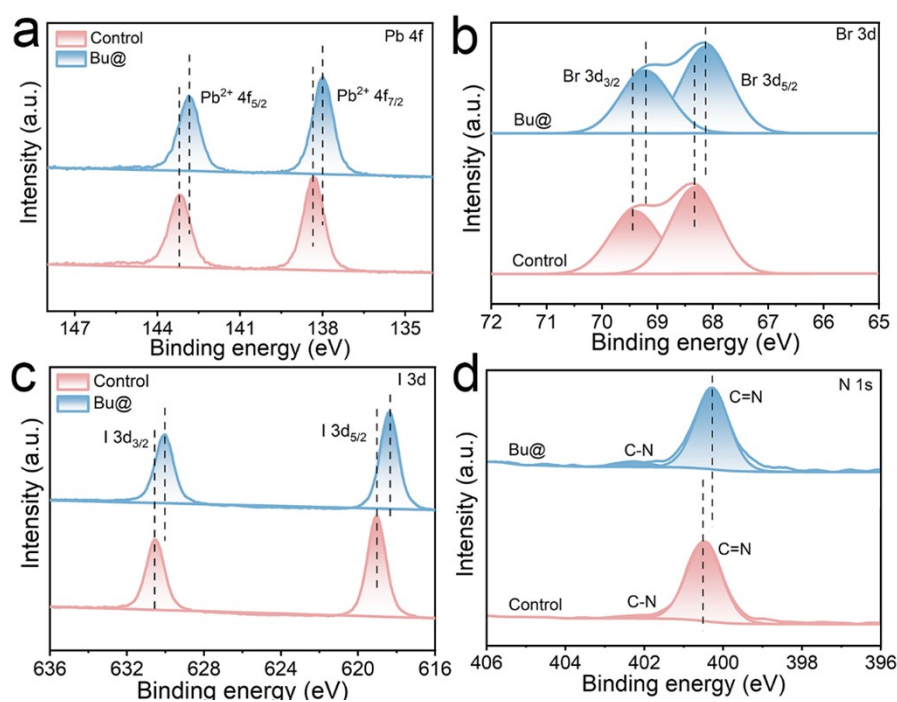

2  
3 **Figure S8.** XPS spectra of (a) Pb 4f; (b) I 3d; (c) Br 3d and (d) N 1s of bottom-side of control and  
4 Bu@-treated perovskite films.

5

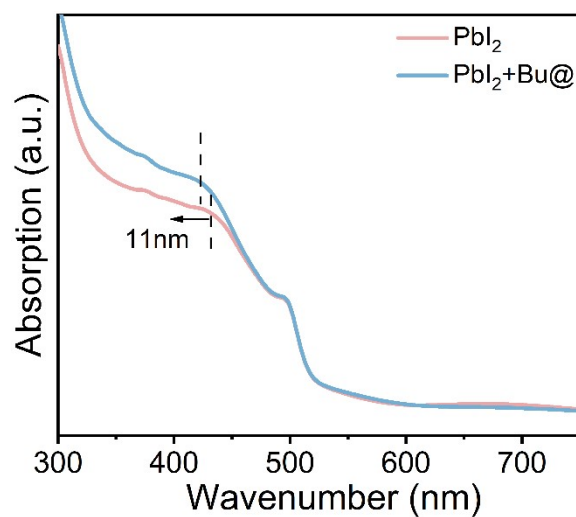

6  
7 **Figure S9.** UV-vis absorption spectra of the neat  $PbI_2$  film and  $PbI_2/Bu@$  bilayer.

8

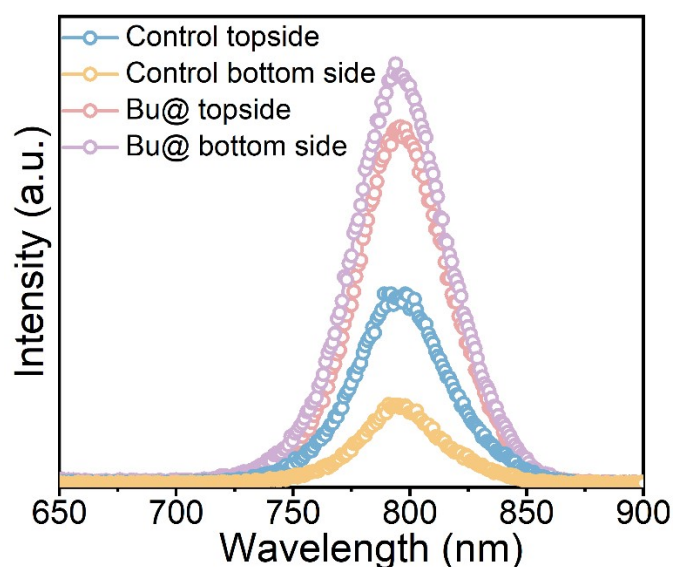

1  
2 **Figure S10.** Steady-state PL spectra (excitation at 520 nm) of the control and Bu@-treated  
3 perovskite films excited from top and bottom sides.

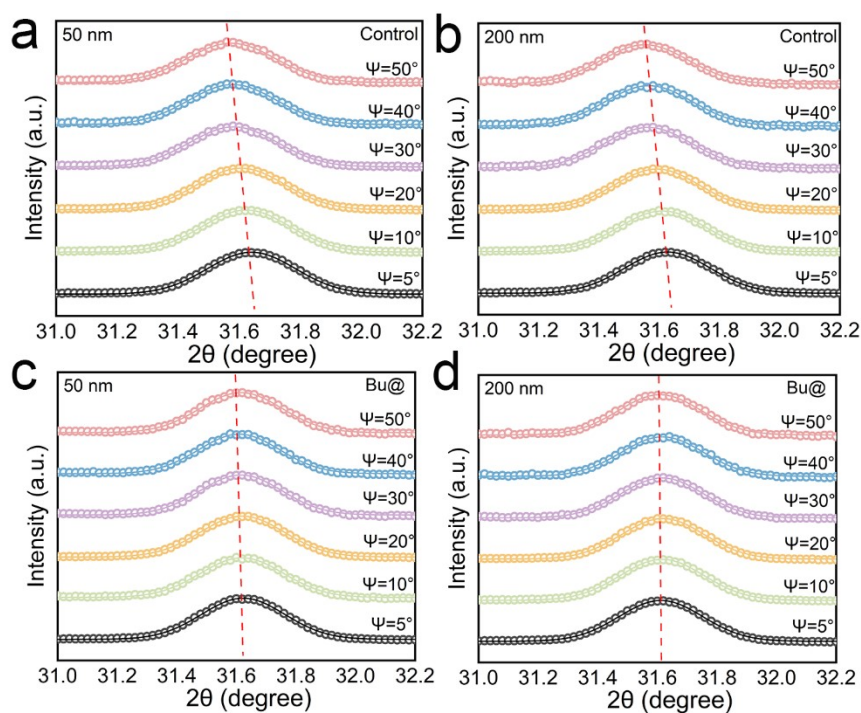

5  
6 **Figure S11.** GIXRD spectra at different tilt angles (a-b) in the depth of 50 nm for a) control perovskite  
7 films. (b) Bu@-treated perovskite film. (c-d) in the depth of 200 nm for c) control perovskite films.  
8 (d) Bu@-treated perovskite film.

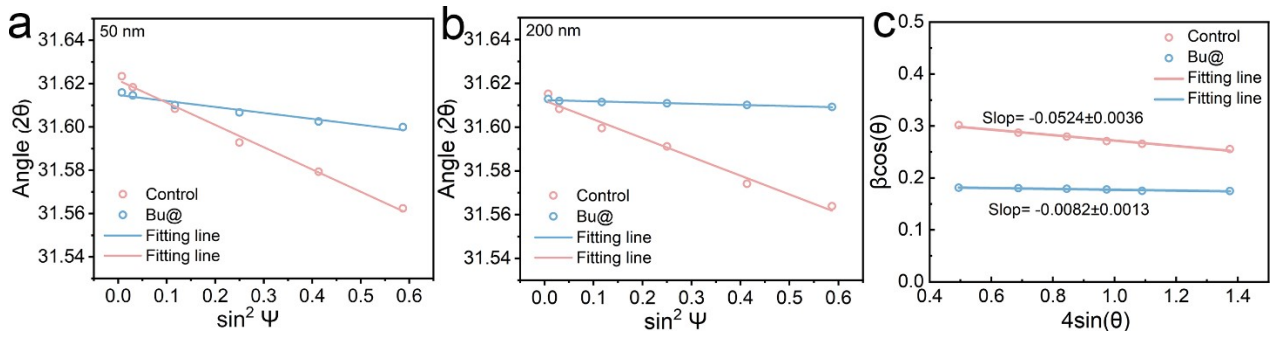

**Figure S12.** Linear fitting of the  $2\theta$ - $\sin^2\Psi$  of the GIXRD spectra at different depths of (a) 50nm and (b) 200nm. (c) Williamson-Hall plots obtained from XRD patterns of the perovskite films without and with Bu@ interlayer.

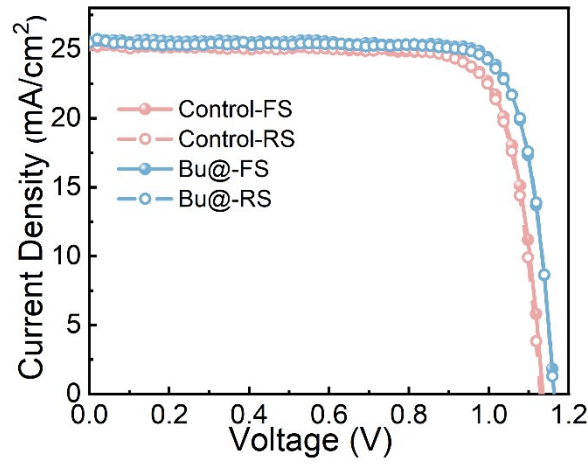

**Figure S13.**  $J$ - $V$  curves of the champion devices with and without Bu@ interlayer measured in forward (solid line) and reverse (dashed line) voltage sweeping modes. The photovoltaic parameters are summarized in Table S6.

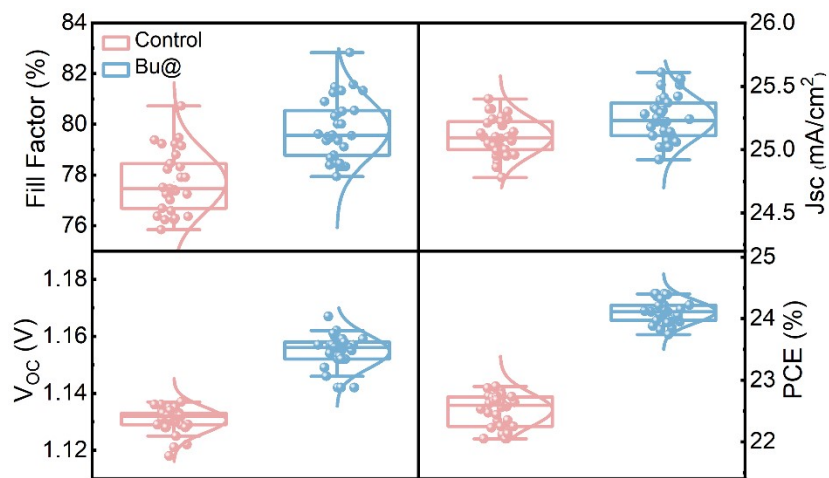



**Figure S14.** Statistics on the performance parameters (FF,  $J_{SC}$ ,  $V_{OC}$ , PCE) of PSCs with and without Bu@ interlayer obtained from 30 devices for each system.

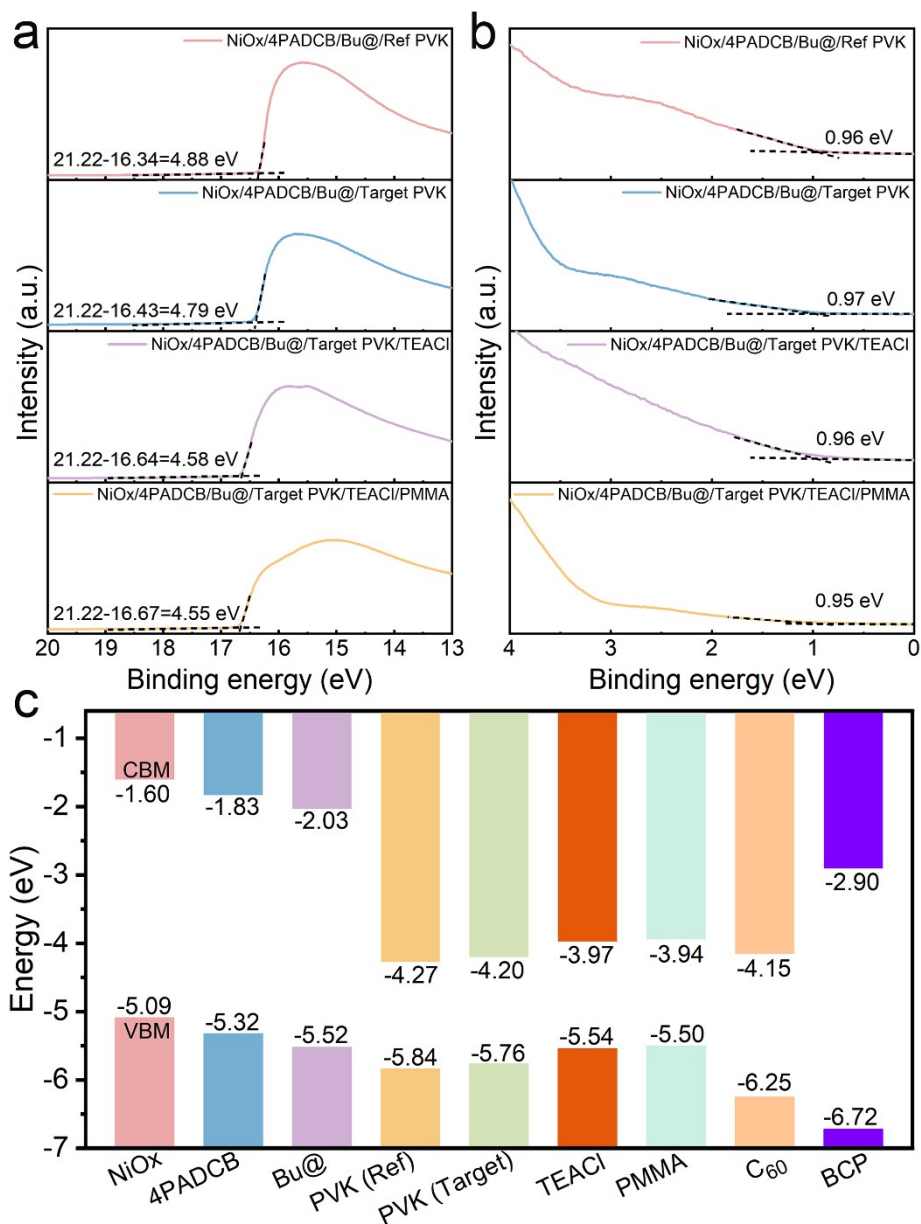

**Figure S15.** a. and b. UPS spectra of perovskite films and HTL layers with different modifications. c. Schematics of the energy alignment of individual layer.

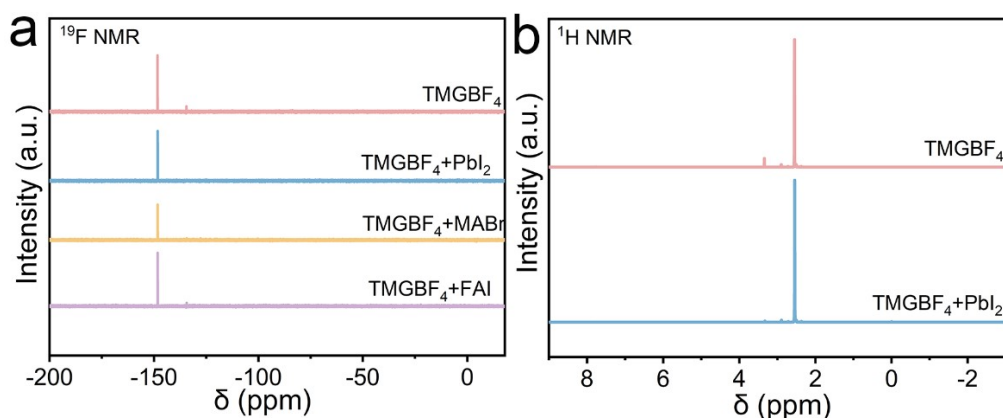

1  
2 **Figure S16.** The proton nuclear magnetic resonance (a)  $^{19}\text{F}$  NMR spectra. (b)  $^1\text{H}$  NMR spectra of  
3 TMGBF<sub>4</sub> when mixed with PbI<sub>2</sub>, FAI and MABr.

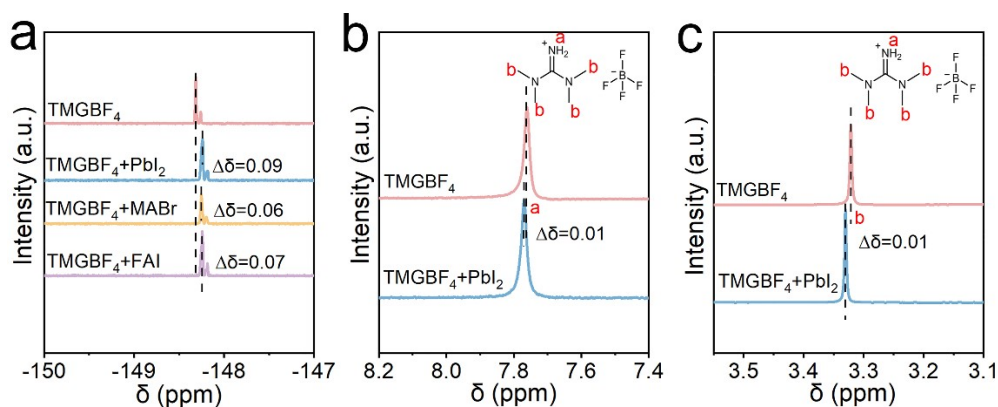

5  
6 **Figure S17.** (a)  $^{19}\text{F}$  NMR spectra of TMGBF<sub>4</sub> solution without or with additives. (b-c)  $^1\text{H}$  NMR spectra  
7 of TMGBF<sub>4</sub> solution without or with PbI<sub>2</sub>.



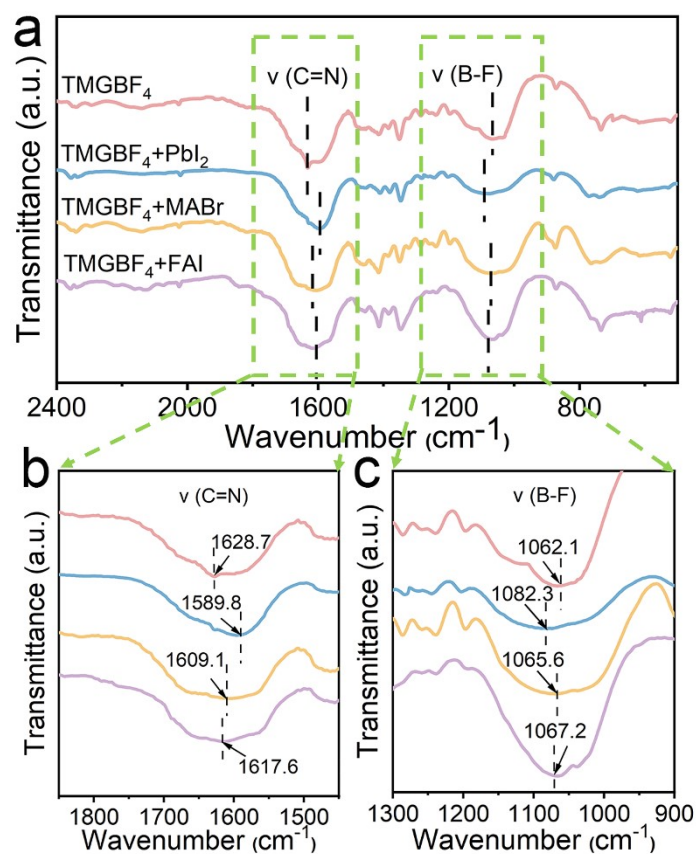

1  
2 **Figure S18.** FTIR spectra of TMGBF<sub>4</sub> solution without or with additives.

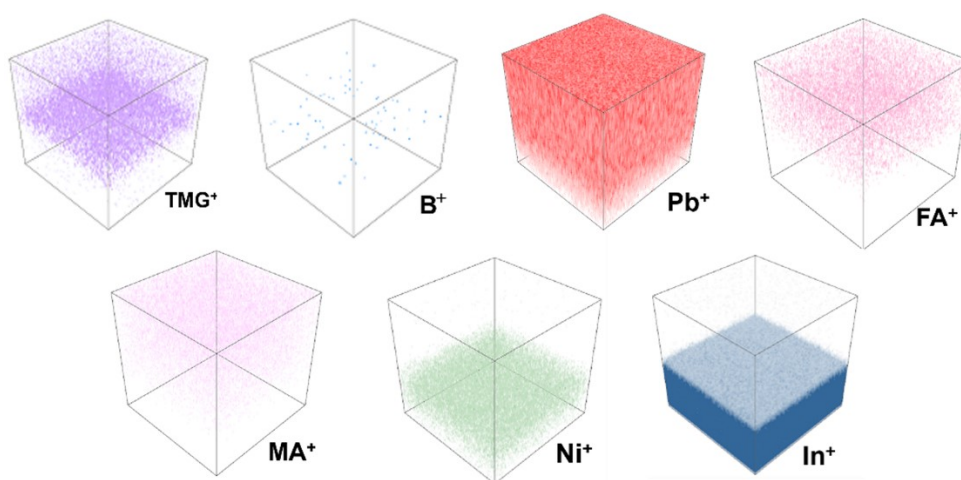

4  
5 **Figure S19.** 3D images of unitary TMGBF<sub>4</sub>-treated perovskite film. The tracked ions are all positively  
6 charged mono-valence fragments.

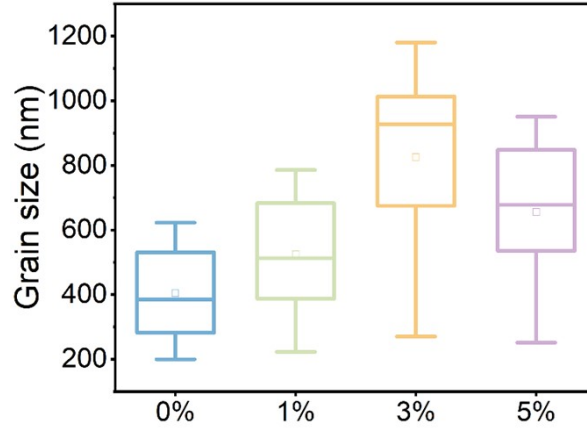

1  
2 **Figure S20.** Grain size distribution in the perovskite films with different TMGBF<sub>4</sub> loadings (0, 1, 3  
3 and 5%, mole percent with respect to PbI<sub>2</sub>).

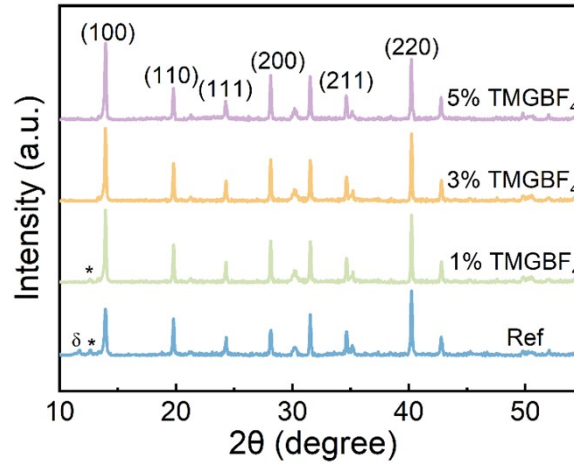

5  
6 **Figure S21.** XRD patterns of the corresponding perovskite films.

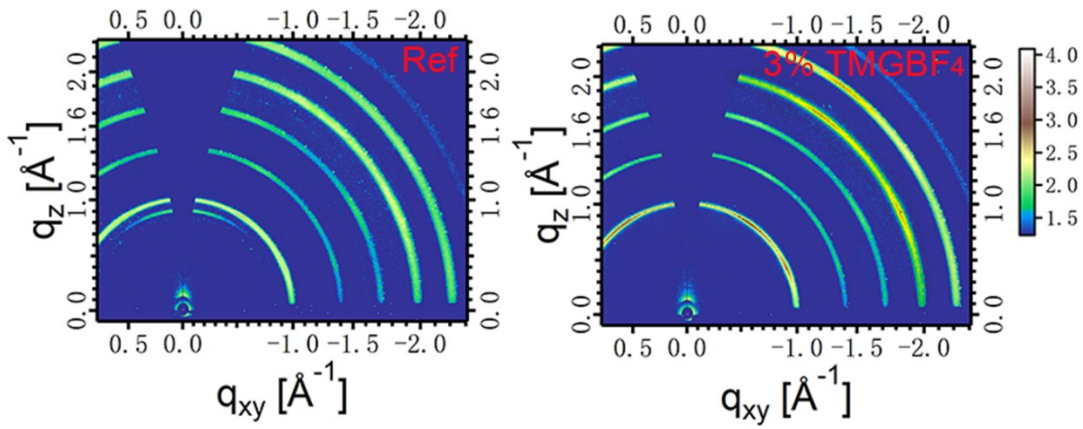

8  
9 **Figure S22.** GIWAXS patterns reference and 3%TMGBF<sub>4</sub>-treated perovskite films.

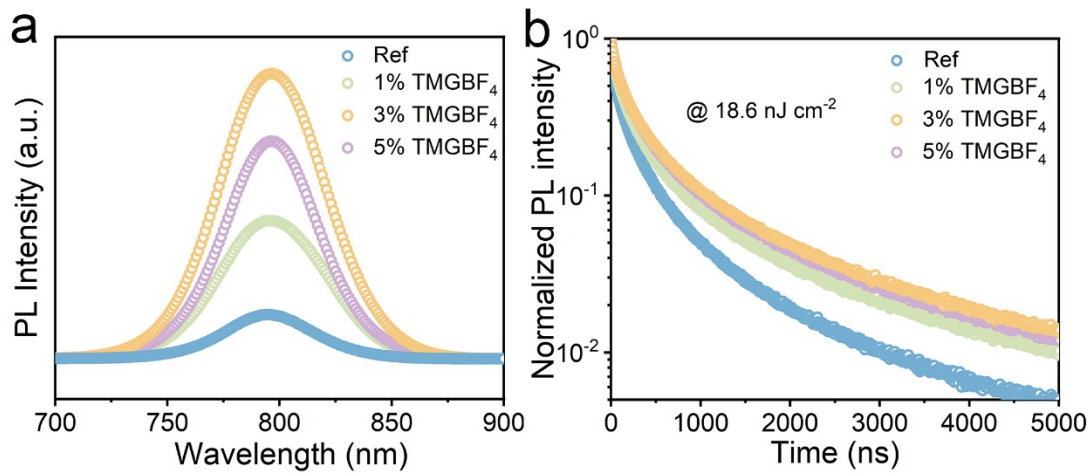

1  
2 **Figure S23.** (a) Steady-state PL spectra. (b) TRPL spectra of the perovskite films with different  
3 TMGBF<sub>4</sub> additive content (0%, 1%, 3% and 5%) deposited on glass.

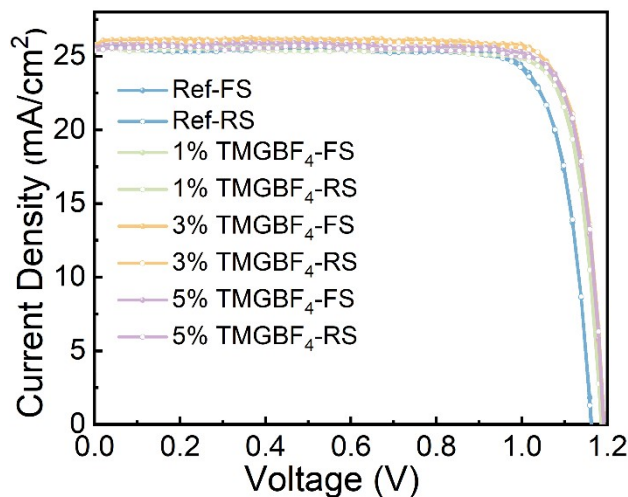

5  
6 **Figure S24.** The *J-V* curves of the PSCs with different concentrations of TMGBF<sub>4</sub> additive. The  
7 photovoltaic parameters are summarized in Table S8.

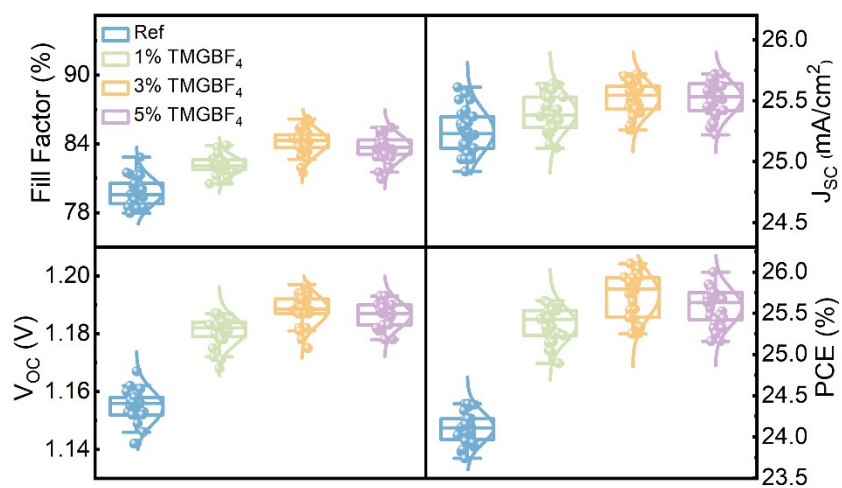

1  
2 **Figure S25.** Statistics on the performance parameters of PSCs with different concentrations of  
3 TMGBF<sub>4</sub> (0%, 1%, 3% and 5%) obtained from 30 devices.  
4

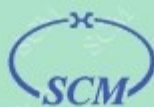

华南国家计量测试中心  
广东省计量科学研究院  
SOUTH CHINA NATIONAL CENTER OF METROLOGY  
GUANGDONG INSTITUTE OF METROLOGY

# 校准证书

CALIBRATION CERTIFICATE

证书编号 NYX202400312  
Certificate No.

第 1 页, 共 4 页  
Page of

|                              |                                                                      |                         |      |
|------------------------------|----------------------------------------------------------------------|-------------------------|------|
| 客户名称<br>Name of the Customer | Aung Ko Ko Kyaw Group, Southern University of Science and Technology |                         |      |
| 联络信息<br>Contact Information  | 1088 Xueyuan Avenue, Nanshan District, Shenzhen, Guangdong, China    |                         |      |
| 计量器具名称<br>Description        | Inverted Perovskite Solar Cell                                       |                         |      |
| 型号/规格<br>Model/Type          | Inverted Perovskite Solar Cell                                       |                         |      |
| 制造厂<br>Manufacturer          | Aung Ko Ko Kyaw Group                                                |                         |      |
| 出厂编号<br>Serial No.           | 20240704 21-2 PSC                                                    | 设备管理编号<br>Equipment No. | ---- |
| 接收日期<br>Receipt on           | 2024 年 07 月 04 日<br>Y M D                                            |                         |      |

结论 见校准结果  
Conclusion Shown in the results of calibration

|                        |                           |
|------------------------|---------------------------|
| 校准日期<br>Calibration on | 2024 年 07 月 04 日<br>Y M D |
| 发布日期<br>Issue on       | 2024 年 07 月 10 日<br>Y M D |

|                     |         |
|---------------------|---------|
| 批准<br>Authorized by | 周军红 周军红 |
| 核验<br>Reviewed by   | 周军红 周军红 |
| 校准<br>Calibrated by | 梅书刚 梅书刚 |

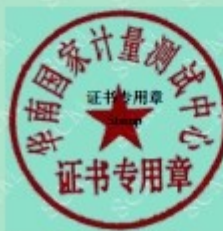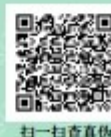

扫一扫查真伪

实验室地址: 广东省东莞市石排镇东园大道石排段152号 邮政编码: 523343  
电话: (8620)86594172 传真: (8620)86590743 投诉电话: (8620)36611242 E-mail: scm@scm.com.cn  
Add: No.1, Miaobianwang Section, Dongyuan Road South, Shipai Town, Dongguan, Guangdong.  
Post Code: 523343 Tel: (8620)86594172 Fax: (8620)86590743 Complaint Tel: (8620)36611242  
证书真伪查询: [www.scm.com.cn](http://www.scm.com.cn): [cert.scm.com.cn](http://cert.scm.com.cn) Certificate AuthenticityIdentify: [www.scm.com.cn](http://www.scm.com.cn): [cert.scm.com.cn](http://cert.scm.com.cn)

5240705041 1



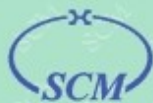

## 校准结果 RESULTS OF CALIBRATION

证书编号 NYX202400312  
Certificate No.

原始记录号 NYX202400312  
Record No.

第 3 页, 共 4 页  
Page of

一、外观检查: 符合要求  
Apparent Inspecti Pass.

二、测试条件: 温度  $(25 \pm 2)^\circ\text{C}$ ; 辐照度  $1000\text{W}/\text{m}^2$ .  
Test conditions: Temperature:  $(25 \pm 2)^\circ\text{C}$ ; Irradiance:  $1000\text{W}/\text{m}^2$ .

三、电流-电压曲线:  
The IV curve:

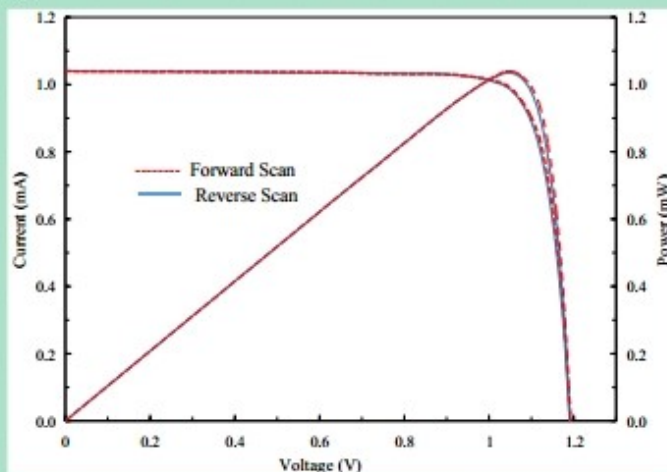

四、光电性能参数 (正扫):  
Results of photoelectric properties (Forward Scan):

表1(Table 1)

| 短路电流<br>密度 $J_{sc}$                 | 短路电流<br>$I_{sc}$         | 开路电压<br>$V_{oc}$           | 填充因子<br>$FF$ | 最大功率<br>$P_m$    | 最佳工作<br>电流 $I_m$              | 最佳工作电<br>压 $V_m$              | 转换效率<br>$\eta$ |
|-------------------------------------|--------------------------|----------------------------|--------------|------------------|-------------------------------|-------------------------------|----------------|
| Short circuit<br>current<br>density | Short circuit<br>current | Open<br>circuit<br>voltage | Fill factor  | Maximum<br>power | Optimum<br>working<br>current | Optimum<br>working<br>voltage | Efficiency     |
| $\text{mA}/\text{cm}^2$             | $\text{mA}$              | $\text{V}$                 | $\%$         | $\text{mW}$      | $\text{mA}$                   | $\text{V}$                    | $\%$           |
| 25.67                               | 1.037                    | 1.192                      | 84.1         | 1.040            | 1.003                         | 1.037                         | 25.74          |

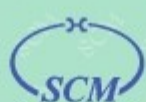

## 校准结果 RESULTS OF CALIBRATION

证书编号 NYX202400312  
Certificate No.

原始记录号 NYX202400312  
Record No.

第 4 页, 共 4 页  
Page of

### 五、光电性能参数 (反扫):

Results of photoelectric properties (Reverse Scan):

表2(Table 2)

| 短路电流<br>密度 $J_{sc}$                 | 短路电流<br>$I_{sc}$         | 开路电压<br>$V_{oc}$           | 填充因子<br>$FF$ | 最大功率<br>$P_m$    | 最佳工作电<br>流 $I_m$              | 最佳工作电<br>压 $V_m$              | 转换效率<br>$\eta$ |
|-------------------------------------|--------------------------|----------------------------|--------------|------------------|-------------------------------|-------------------------------|----------------|
| Short circuit<br>current<br>density | Short circuit<br>current | Open<br>circuit<br>voltage | Fill factor  | Maximum<br>power | Optimum<br>working<br>current | Optimum<br>working<br>voltage | Efficiency     |
| mA/cm <sup>2</sup>                  | mA                       | V                          | %            | mW               | mA                            | V                             | %              |
| 25.69                               | 1.038                    | 1.190                      | 83.6         | 1.033            | 0.996                         | 1.037                         | 25.57          |

### 说明:

Note:

1、电池有效面积数据为0.0404 cm<sup>2</sup> (有效面积基于金属掩模版面积)。

The effective area data of the cell is 0.0404 cm<sup>2</sup> (Effective area based on a metal aperture mask).

2、本次测量结果的扩展不确定度为: 开路电压 $V_{oc}$ :  $U_{rel}=1.2\%$ , 短路电流 $I_{sc}$ :  $U_{rel}=2.7\%$ , 最大功率 $P_{max}$ :  $U_{rel}=3.0\%$ , ( $k=2$ )。

The expanded uncertainty of measuring results:  $V_{oc}$ :  $U_{rel}=1.2\%$ ,  $I_{sc}$ :  $U_{rel}=2.7\%$ ,  $P_{max}$ :  $U_{rel}=3.0\%$ , ( $k=2$ ).

3、校准活动中对测量结果有影响的条件: 温度:(25±2)℃ 湿度:(50±5)%RH。

Conditions under which the calibrations were made that have an influence on the measurement results:

Temperature:(25±2)℃ Humidity:(50±5)%RH.

4、本证书中给出的扩展不确定度依据JJF1059.1-2012《测量不确定度评定与表示》评定,由合成标准不确定度乘以包含概率约为95%时对应的包含因子 $k$ 得到。

The expanded uncertainty given in this certificate is evaluated according to JJF 1059.1-2012 "Evaluation and Expression of Uncertainty in Measurement", which is obtained by multiplying the combined standard uncertainty by the coverage factor  $k$  corresponding to the coverage probability of about 95%.

5、该仪器的溯源日期为本证书的“校准日期”,由于复校时间间隔的长短是由仪器的使用情况、使用者、仪器本身质量等诸因素所决定的,因此,送校单位可根据实际使用情况自主决定复校时间间隔。更换重要部件、维修或对仪器性能有怀疑时,应及时校准。

The traceability date of this instrument is the "Calibration Date" on this certificate. Since the calibration interval is determined by the use of the instrument, operation of the user, the quality of the instrument itself and other factors, the re-calibration date can be decided by the user according to the actual situation. In case of replacement of important parts, maintenance or doubt on the performance of the instrument, it shall be calibrated in time.

1

2 **Figure S26.** Independent efficiency certification of perovskite solar cells by an accredited institute  
3 of South China National Center of Metrology, giving a PCE of 25.74% (short-circuit current ( $I_{sc}$ ) of  
4 1.037 mA,  $V_{oc}$  of 1.192 V and FF of 84.1%, forward scan) of the champion device.

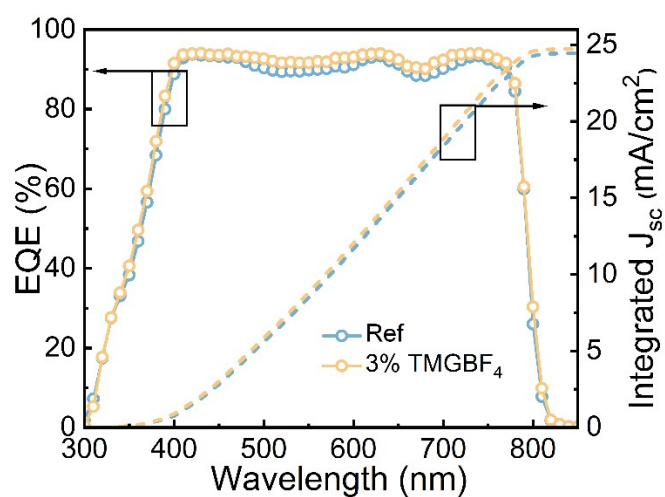

1

2 **Figure S27.** EQE spectra and the corresponding integrated  $J_{sc}$ .

3

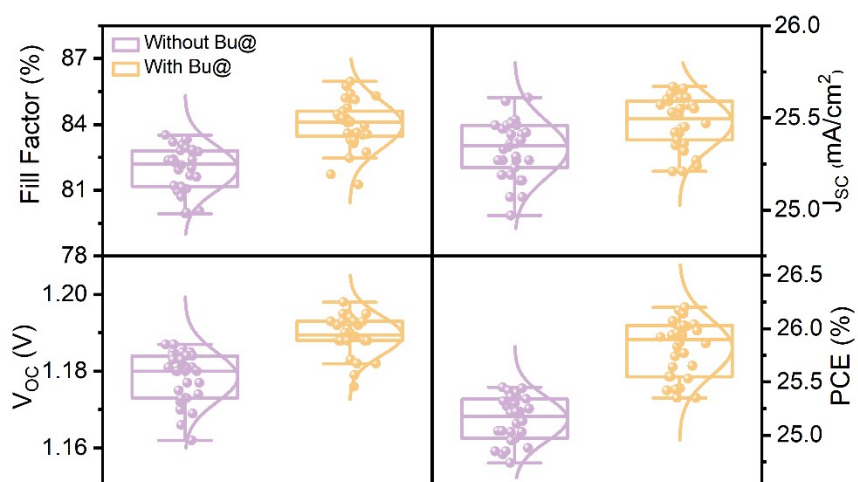

4

5 **Figure S28.** Statistics on the performance parameters of PSCs with and without Bu@ interface  
6 modification, while both are treated with TMGBF<sub>4</sub> obtained from 30 devices.

7



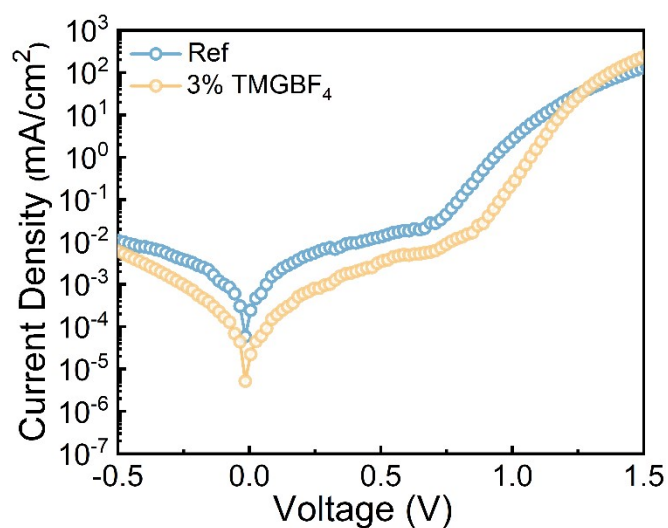

1  
2 **Figure S29.** Dark  $J$ - $V$  curves of the corresponding devices.

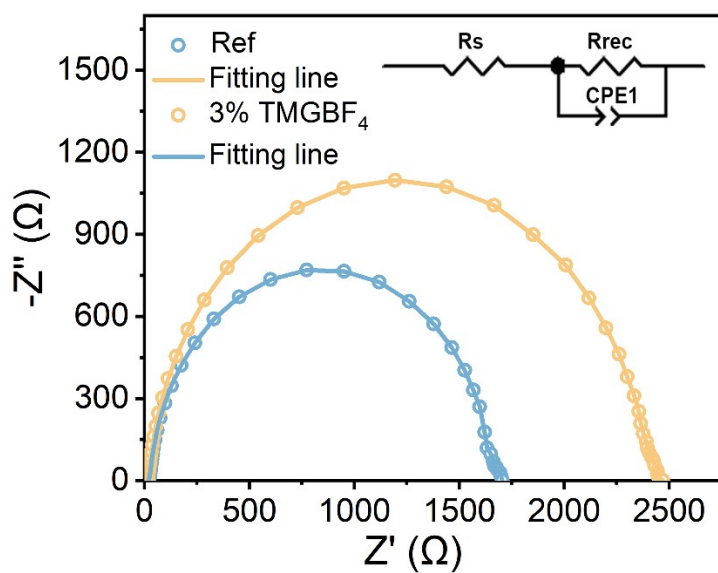

4  
5 **Figure S30.** Nyquist plots of the corresponding devices. Inset shows its equivalent circuit.

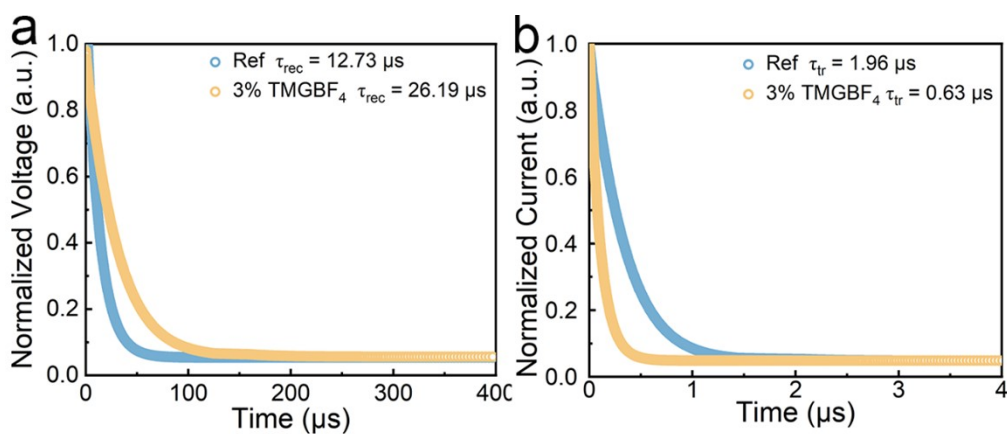

1 **Figure S31.** (a) TPV and (b) TPC spectra of the reference and the TMGBF<sub>4</sub>-treated devices.

2

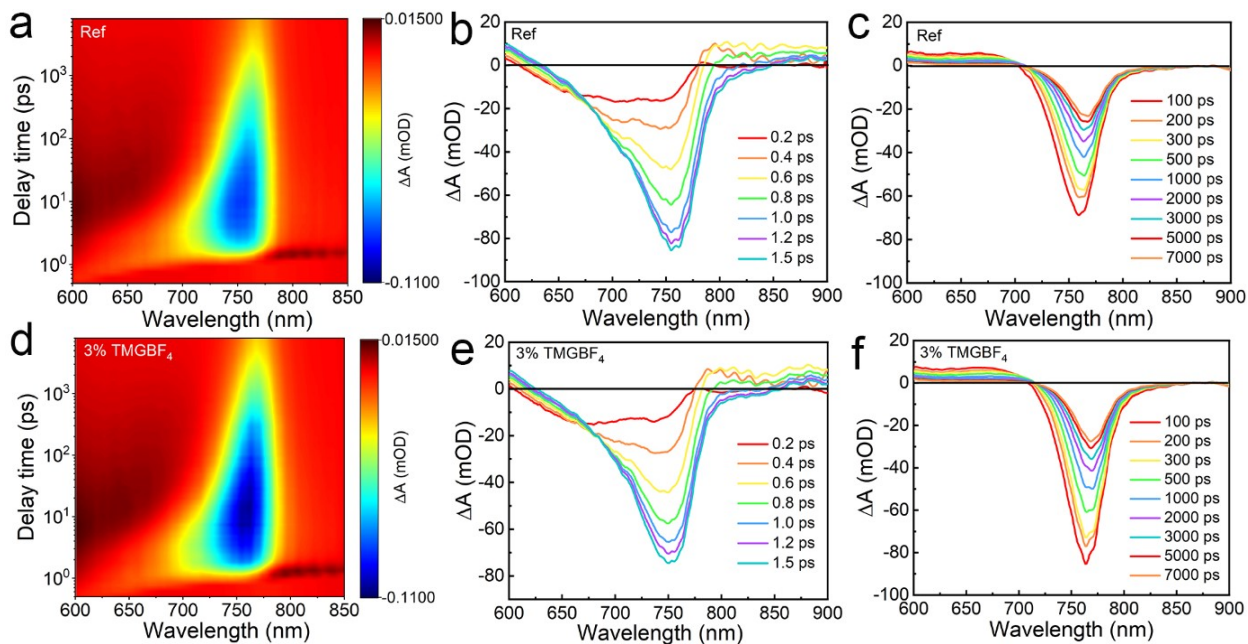

3

4 **Figure S32.** (a) and (d) The pseudo-color TA spectrum plot of reference and 3%TMGBF<sub>4</sub>-treated  
5 perovskite films. (b) and (e) Delay time-dependent TA spectra (time scale: 0.2-1.5 ps) for reference  
6 and 3%TMGBF<sub>4</sub>-treated perovskite films. (c) and (f) Delay time-dependent TA spectra (time scale:  
7 100-7000 ps) for reference and 3%TMGBF<sub>4</sub>-treated perovskite films.

8

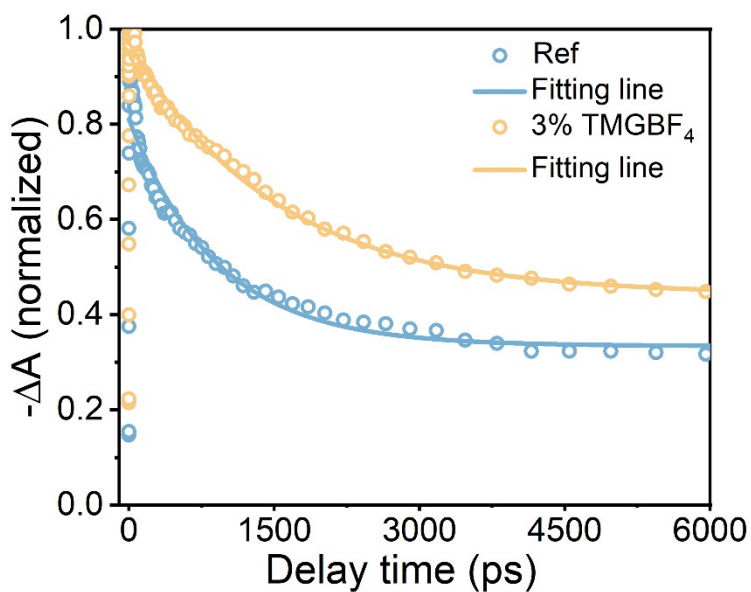

9

10 **Figure S33.** The bleach recovery kinetics for reference and the TMGBF<sub>4</sub>-treated perovskite films

1 following the excitation at probe wavelength at 760 nm.

2

3

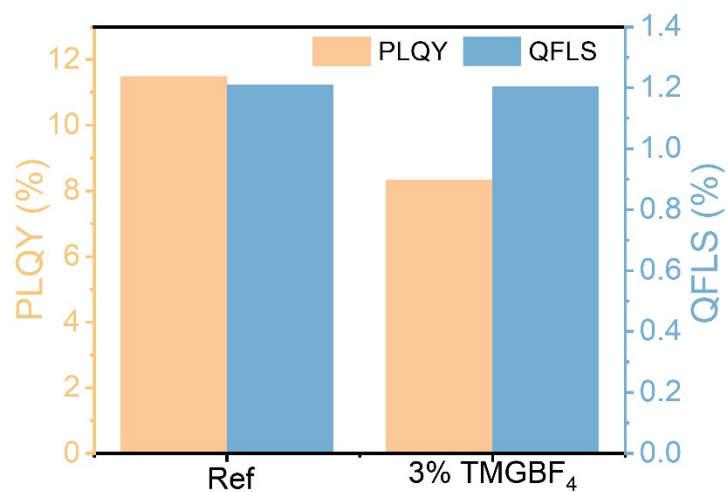

4

5 **Figure S34.** The PLQY measurements and calculated QFLS values of reference and TMGBF<sub>4</sub>-treated  
6 samples.

7

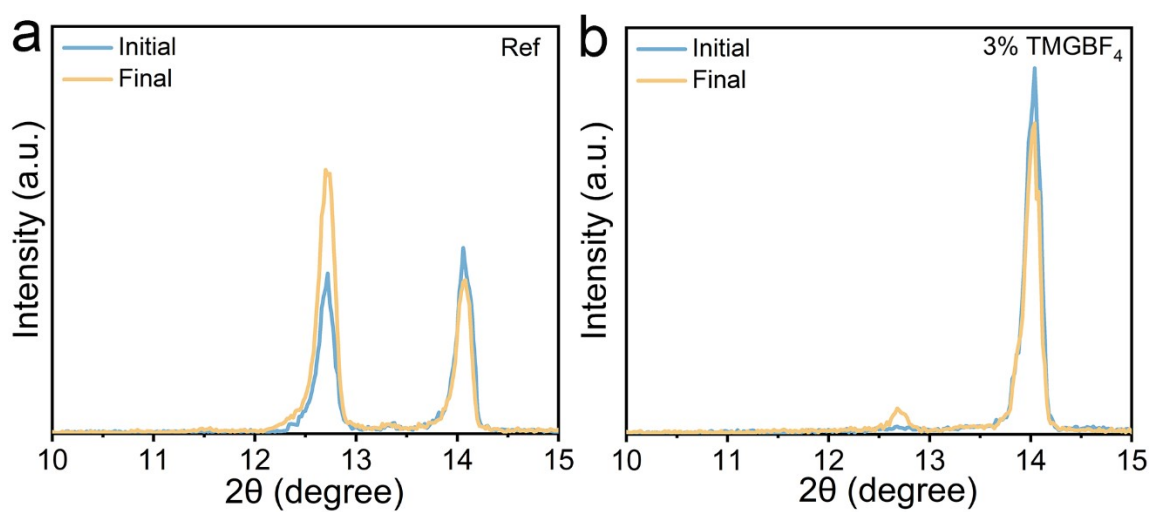

8

9 **Figure S35.** XRD patterns of (a) the reference and (b) TMGBF<sub>4</sub>-treated perovskite films at the  
10 beginning (1minute) and ending (70 minutes) time under 150±5°C in vacuum.

11

1 **Table S1.** The calculation data for relative content of hydroxide on different samples.

| Samples        |                   | Hydroxide peak | Lattice oxygen | Deficiency | Ratio |
|----------------|-------------------|----------------|----------------|------------|-------|
|                |                   | area           | peak area      | area       | (%)   |
| ITO/4PADCB     | Initial           | 2592.32        | 15515.93       | 10405.82   | 16.7  |
|                | DMF rinse         | 1102.23        | 14478.61       | 7779.13    | 7.6   |
|                | Methanol<br>rinse | 2035.66        | 12965.98       | 7615.73    | 15.7  |
| ITO/4PADCB/Bu@ | Initial           | 3477.42        | 22083.62       | 12462.69   | 15.6  |
|                | DMF rinse         | 2489.60        | 16062.38       | 7082.48    | 15.5  |

2

3 **Table S2.** Time-resolved PL data of perovskite films.

| Samples                                         | $\tau_1$ (ns) | $A_1$ (%) | $\tau_2$ (ns) | $A_2$ (%) | $\tau_{avg}$ (ns) |
|-------------------------------------------------|---------------|-----------|---------------|-----------|-------------------|
| Glass/ITO/NiO <sub>x</sub> /4PADCB//PVK         | 9.84          | 2.8       | 215.05        | 97.2      | 214.8             |
| Glass/ITO/ NiO <sub>x</sub> /4PADCB/<br>Bu@/PVK | 82.46         | 1.7       | 676.83        | 98.3      | 675.5             |

$$\tau_{avg} = \frac{\sum_{i=1}^n A_i \tau_i^2}{\sum_{i=1}^n A_i \tau_i}$$

4 The average lifetime ( $\tau_{avg}$ ) of perovskite films on quartz calculated with

5

**Table S3.** Instrumental angles ( $\Psi$ ,  $\omega$ ,  $\Phi$ ) set for (012) crystal plane in different depths of GIXRD residual stress measurements.

| Depth (nm) | (hkl) | $\Psi$ (°) | $\omega$ (°) | $\Phi$ (°) |
|------------|-------|------------|--------------|------------|
| 50         | (012) | 5          | 0.3114       | -17.4592   |
|            |       | 10         | 0.3151       | -32.0793   |
|            |       | 20         | 0.3303       | -51.0211   |
|            |       | 30         | 0.3588       | -61.082    |
|            |       | 40         | 0.4063       | -66.8129   |
|            |       | 50         | 0.4855       | -70.3293   |
| 200        | (012) | 5          | 1.8318       | -19.31     |
|            |       | 10         | 1.8544       | -34.9649   |
|            |       | 20         | 1.95         | 54.2136    |
|            |       | 30         | 2.1293       | -64.0587   |
|            |       | 40         | 2.4333       | -69.7122   |
|            |       | 50         | 2.9548       | 2.9548     |

**Table S4.** The slope of the residual strain fitting line and strain values for the perovskite films with and without Bu(MIm)<sub>2</sub>Br<sub>2</sub> at the depth of 50 nm and 200 nm.

| Depth (nm) | Films   | Slope        | Strain (MPa) |
|------------|---------|--------------|--------------|
| 50         | Control | -0.103±0.004 | 24.28±0.94   |
|            | Bu@     | -0.054±0.003 | 12.73±0.70   |
| 200        | Control | -0.086±0.002 | 20.26±0.47   |
|            | Bu@     | -0.027±0.002 | 6.36±0.47    |

1

2 **Table S5.** Photovoltaic parameters for PSCs with or without Bu(MIm)<sub>2</sub>Br<sub>2</sub> layer.

| Device type | Scan<br>direction | $V_{oc}$<br>(V) | $J_{sc}$<br>(mA/cm <sup>2</sup> ) | FF<br>(%) | PCE<br>(%) |
|-------------|-------------------|-----------------|-----------------------------------|-----------|------------|
| Control     | RS                | 1.135           | 25.44                             | 78.92     | 22.80      |
|             | FS                | 1.129           | 25.29                             | 79.64     | 22.72      |
| Bu@         | RS                | 1.164           | 25.55                             | 81.93     | 24.36      |
|             | FS                | 1.162           | 25.47                             | 81.75     | 24.20      |

3 Note: Forward scan and reverse scan were denoted as FS and RS, respectively.

4

5 **Table S6.** Time-resolved PL data of perovskite films with or without TMGBF<sub>4</sub>.

| Samples                             | $\tau_1$ ( $\mu$ s) | $A_1$ (%) | $\tau_2$ ( $\mu$ s) | $A_2$ (%) | $\tau_{avg}$ ( $\mu$ s) |
|-------------------------------------|---------------------|-----------|---------------------|-----------|-------------------------|
| Glass/ITO/0%TMGBF <sub>4</sub> +PVK | 0.193               | 0.90      | 0.844               | 99.1      | 0.842                   |
| Glass/ITO/1%TMGBF <sub>4</sub> +PVK | 0.464               | 1.4       | 1.048               | 98.6      | 1.044                   |
| Glass/ITO/3%TMGBF <sub>4</sub> +PVK | 0.493               | 2.4       | 1.221               | 97.6      | 1.268                   |
| Glass/ITO/5%TMGBF <sub>4</sub> +PVK | 0.291               | 1.8       | 1.273               | 98.2      | 1.216                   |

6

7 **Table S7.** Photovoltaic parameters for PSCs with different concentrations of TMGBF<sub>4</sub>.

| Device type           | Scan<br>direction | $V_{oc}$<br>(V) | $J_{sc}$<br>(mA/cm <sup>2</sup> ) | FF<br>(%) | PCE<br>(%) |
|-----------------------|-------------------|-----------------|-----------------------------------|-----------|------------|
| Ref                   | RS                | 1.164           | 25.55                             | 81.93     | 24.36      |
|                       | FS                | 1.162           | 25.47                             | 81.75     | 24.20      |
| 1% TMGBF <sub>4</sub> | RS                | 1.187           | 25.66                             | 83.77     | 25.52      |
|                       | FS                | 1.182           | 25.64                             | 83.19     | 25.23      |
| 3% TMGBF <sub>4</sub> | RS                | 1.192           | 25.78                             | 85.21     | 26.18      |
|                       | FS                | 1.193           | 25.67                             | 84.70     | 25.94      |
| 5% TMGBF <sub>4</sub> | RS                | 1.190           | 25.63                             | 84.53     | 25.80      |
|                       | FS                | 1.192           | 25.39                             | 84.90     | 25.69      |

1 Note: Forward scan and reverse scan were denoted as FS and RS, respectively.

2

3 **Table S8.** The EIS fitting results of PSCs with different concentrations of TMGBF<sub>4</sub>.

| Device | R <sub>s</sub><br>(Ω) | R <sub>rec</sub><br>(Ω) | CPE <sub>T1</sub><br>(F) | CPEP <sub>1</sub><br>(F) |
|--------|-----------------------|-------------------------|--------------------------|--------------------------|
| Ref    | 5.19                  | 3474                    | 8.54 ×10 <sup>-9</sup>   | 0.9824                   |
| Target | 1.80                  | 4520                    | 8.62 ×10 <sup>-8</sup>   | 0.9949                   |

4

5

## 1 Supplementary References

- 2 1. H. Wang, C. Zhu, L. Liu, S. Ma, P. Liu, J. Wu, C. Shi, Q. Du, Y. Hao, S. Xiang, H. Chen, P. Chen, Y.  
3 Bai, H. Zhou, Y. Li and Q. Chen, *Adv Mater*, 2019, **31**, e1904408.
- 4 2. M. Ghasemi Hajiabadi, M. Zamanian and D. Souri, *Ceramics International*, 2019, **45**, 14084-  
5 14089.
- 6 3. C. Shan, T. Liu, J. Zhou, Y. He, D. Luo, Z. Jiang, Z. Wang, Q. Liu, C. a. Li, F. Zhang, E. Zhou, K.  
7 Wang and A. K. K. Kyaw, *Chemical Engineering Journal*, 2023, **471**.
- 8 4. R. Chen, J. Wang, Z. Liu, F. Ren, S. Liu, J. Zhou, H. Wang, X. Meng, Z. Zhang, X. Guan, W. Liang,  
9 P. A. Troshin, Y. Qi, L. Han and W. Chen, *Nature Energy*, 2023, **8**, 839-+.
- 10 5. S. Ye, H. Rao, Z. Zhao, L. Zhang, H. Bao, W. Sun, Y. Li, F. Gu, J. Wang, Z. Liu, Z. Bian and C. Huang,  
11 *Journal of the American Chemical Society*, 2017, **139**, 7504-7512.
- 12 6. Zhenyi Ni, Chunxiong Bao, Ye Liu, Qi Jiang, Wu-Qiang Wu, Shangshang Chen, Xuezheng Dai, Bo  
13 Chen, Barry Hartweg, Zhengshan Yu, Zachary Holman and J. Huang, *Science*, 2020, **6484**,  
14 1352-+.
- 15 7. A. Ullah, K. H. Park, H. D. Nguyen, Y. Siddique, S. F. A. Shah, H. Tran, S. Park, S. I. Lee, K. K. Lee,  
16 C. H. Han, K. Kim, S. Ahn, I. Jeong, Y. S. Park and S. Hong, *Advanced Energy Materials*, 2021,  
17 **12**.

18
